# Supplementary material for: Direct regeneration of spent LiFePO4 cathode materials assisted with a bifunctional organic lithium salt
Source: Royal Society of Chemistry journal article supplement (doi:10.1039/d4cc02962c), 2024-01-01
Supplement: d4cc02962c1.pdf [file d4cc02962c1.pdf]

## Supporting Information

### Direct regeneration of spent $\text{LiFePO}_4$ cathode materials assisted with a bifunctional organic lithium salt

*Lu Yang,<sup>a</sup> Baichao Zhang,<sup>a</sup> Shuo Chen,<sup>a</sup> Qing Pan,<sup>a</sup> Wenyuan Li,<sup>a</sup> Chaolun Gan,<sup>b</sup>  
Wentao Deng,<sup>a</sup> Guoqiang Zou,<sup>a</sup> Hongshuai Hou,<sup>a</sup> Li Yang<sup>\*c</sup> and Xiaobo Ji<sup>\*a</sup>*

*<sup>a</sup>College of Chemistry and Chemical Engineering, Central South University,  
Changsha, 410083, China*

*<sup>b</sup>Zhangjiagang Guotai Huarong New Chemical Materials Co., Ltd,  
Zhangjiagang, China.*

*<sup>c</sup>School of Science, Hunan University of Technology and Business,  
Changsha, 410205, China.*

#### Corresponding Author

*\* Email address: [xji@csu.edu.cn](mailto:xji@csu.edu.cn) ; [liyang0926@hutb.edu.cn](mailto:liyang0926@hutb.edu.cn)*

## **Text S1 Experimental**

### **Materials**

The relevant reagents employed in this process were analytic grade, including Lithium citrate( $\text{Li}_3\text{C}_6\text{H}_5\text{O}_7 \cdot 4\text{H}_2\text{O}$ ), ethylene glycol( $\text{C}_2\text{H}_6\text{O}_2$ ), dimethyl carbonate (DMC), N-methyl-pyrrolidone (NMP), etc. The above chemicals were sourced from Aladdin Chem. Co., Ltd and used without further purification. Spent  $\text{LiFePO}_4$  pouch batteries were supplied by Zhuzhou Smelter Group Co., LTD.

### **Degraded $\text{LiFePO}_4$ cathode materials harvesting**

The cells were first discharged in the saturated NaCl solution for 24 h and then disassemble and sort manually to get the battery shell, spent LFP anode sheets, spent LFP cathode sheets, separator and so on. The cathode sheets were washed with DMC and dried. After drying, these sheets were immersed in an appropriate amount of deionized water for 30 minutes to ensure complete detachment of the active substance from the collector. The resultant spent LFP (S-LFP) powders were separated, dried for regeneration. The main pretreatment process was shown in Figure S1.

### **$\text{LiFePO}_4$ regeneration**

The regeneration of S-LFP was carried out by the method of hydrothermal relithiation. For the hydrothermal relithiation treatment, 0.004 mol of lithium citrate was dissolved in 40 ml of ethylene glycol within a 100 mL reactor to prepare the lithium citrate solution. The above 0.5g of S-LFP was then added for a hydrothermal reaction. In order to explore the optimal regeneration parameters, the effects of different reaction temperatures (100-180 °C) and reaction times (1-12 h) on the physical structure and electrochemical performances of regenerated LFP cathode materials were investigated. Following the reaction, the regenerated LFP (R-LFP) were repeatedly washed with deionized water and dried.

### **Materials characterization**

The element contents of spent and regenerated samples was evaluated by inductively coupled plasma-optical emission spectrometer (ICP-OES, Optima-3000DV, USA). The crystal structures of various powders throughout the regeneration process were determined by X-ray powder diffraction (XRD, Ultima IV, Japan) employing Cu  $K\alpha$  radiation. The identification of chemical groups or bonds present in cathode powders was accomplished via Fourier transform infrared spectroscopy (FTIR, VERTEX 70, Germany) and Raman spectroscopy(Raman, Alpha300R, Germany). Surface compositional studies of related materials were undertaken using X-ray photoelectron spectroscopy (XPS, Thermo Scientific

Nexsa, England). The surface morphologies of degraded, regenerated LFP were observed by scanning electron microscope (SEM, ZEISS Sigma 300, Germany). The microstructure, lattice fringe of the powders were examined by high-resolution transmission electron microscopy with energy dispersive spectroscopy (HRTEM-EDS, FEI TitanG260-300, USA).

### **Electrochemical characterization**

The regenerated lithium iron phosphate cathode powder was mixed with Super P and polyvinylidene fluoride (PVDF) in NMP according to the mass ratio of 8:1:1 to obtain a uniform slurry. The resulted slurry is coated on the aluminum foil, followed by vacuum drying at 120 °C for 6 h. The dried electrode sheet is cut into a cathode electrode sheet with a diameter of 14 mm, thereafter assembling button batteries within an argon-filled glove box. The  $\text{LiFePO}_4$  electrode sheet was used as the cathode electrode, while the anode electrode was lithium metal. The electrolyte comprised 1 mol  $\text{L}^{-1}$  lithium hexafluorophosphate ( $\text{LiPF}_6$ ) dissolved in a mixture of ethyl carbonate (EC), dimethyl carbonate (DMC), and diethyl carbonate (DEC) in equal volume proportions. Galvanostatic charge-discharge was carried out in the potential range of 2.5–4.1 V with the assembled cells. The cells were cycled with activation for 3 cycles at 0.1 C followed by extended cycling at higher rates. Electrochemical evaluations, including cyclic voltammetry (CV) were conducted on both R-LFP and S-LFP utilizing an electrochemical workstation (DH 7000, Donghua Testing Technology Co., Ltd).

## Text S2 Calculation of Gibbs Free Energy

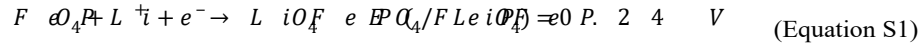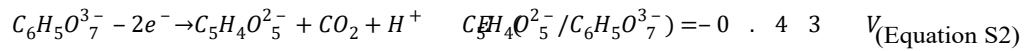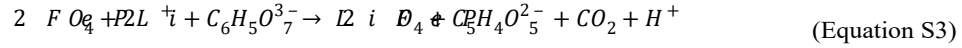

$E(C_5H_4O_5^{2-}/C_6H_5O_7^{3-}) = -0.43$  (versus  $V_{SHE}$ ) was calculated based on the Nernst equation, where  $E^\theta$  is obtained from literature (-0.18 V)<sup>1</sup>, n is the number of moles of electrons, R is the gas constant, and T is temperature in Kelvin.

$$E = E^\theta - \left(\frac{RT}{ZF}\right) \times \ln\left(\frac{C_{red}}{C_{ox}}\right) \quad \text{(Equation S4)}$$

$$= E^\theta - \left(\frac{RT}{ZF}\right) \times \ln\left(\frac{C_{(C_6H_5O_7^{3-})}}{C_{(C_5H_4O_5^{2-})} \times P_{CO_2} \times C_{H^+}}\right)$$

where the pH value (8.0) was obtained from pH meter. Besides, only the effect of pH value was considered here. The activities of other species were set as 1.<sup>2</sup> The Gibbs free energy for the complete reaction (Equation 1 in the main text) can be calculated using the following equation:

$$\begin{aligned} \Delta G &= -nFE \\ &= -nF(E(F \text{ O}_4^{2-} \text{ i} \text{ O}_4^{2-}) - E(C_5H_4O_5^{2-}/C_6H_5O_7^{3-})) \end{aligned} \quad \text{(Equation S5)}$$

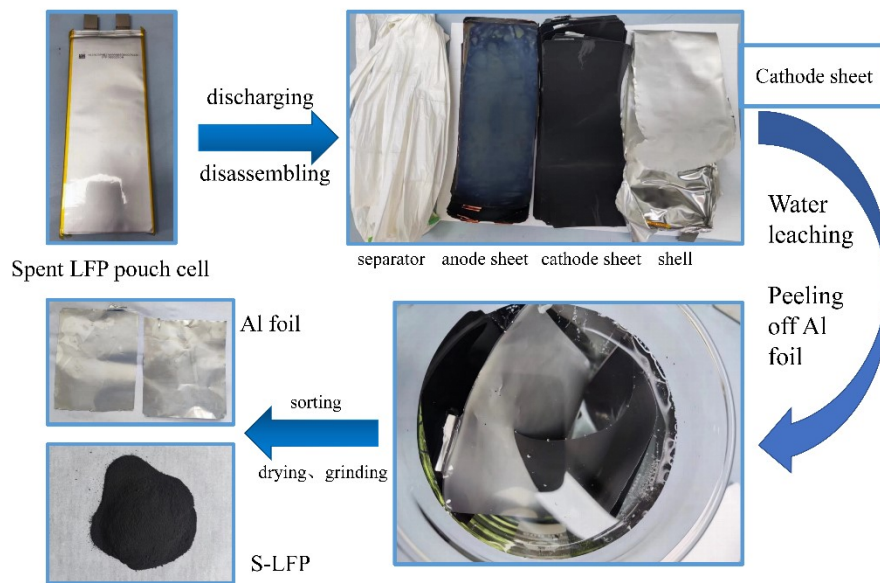

**Figure S 1** Main pre-treatment process

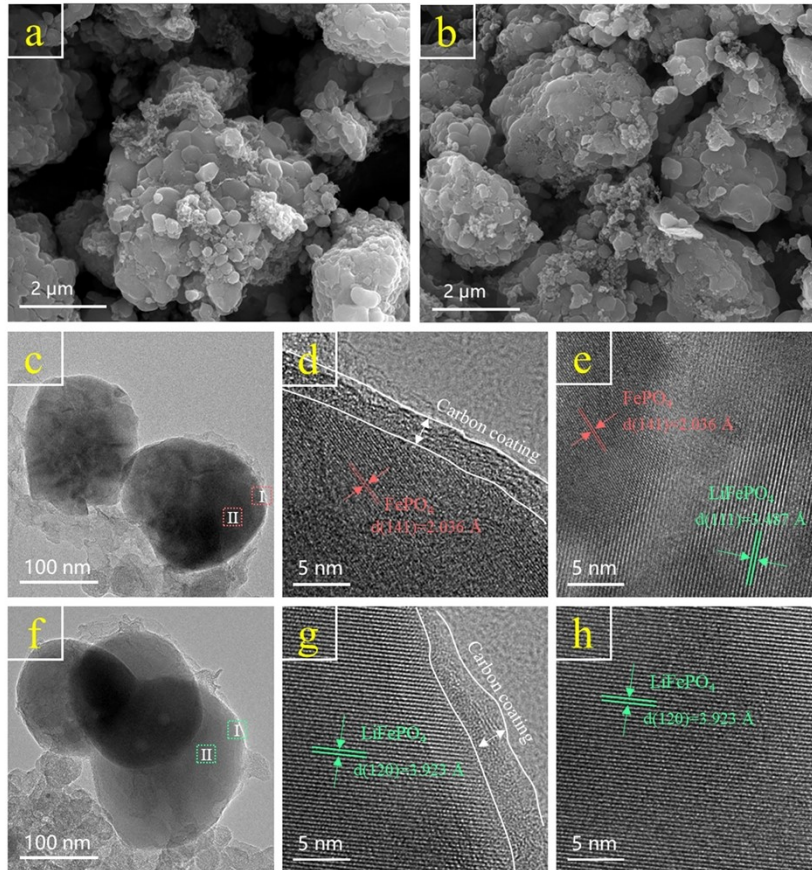

**Figure S 2** SEM images of S-LFP (a) and R-LFP (b) materials; TEM images of S LFP (c)–(e) and R-LFP (f)–(h) materials, where (d) and (e) are high resolution images of red rectangle regions I and II in (c), and (g) and (h)

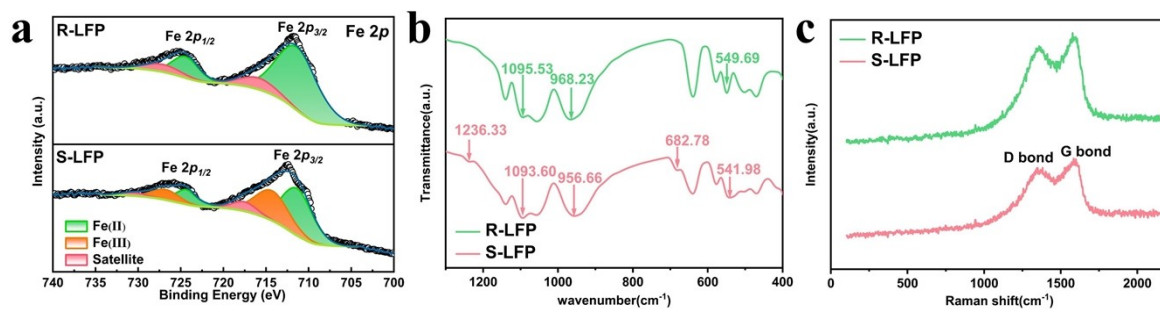

**Figure S 3** (a) XPS images of S-LFP and R-LFP; (b) FTIR comparison spectra of S-LFP and R-LFP;(c) Raman spectra of S-LFP and R-LFP

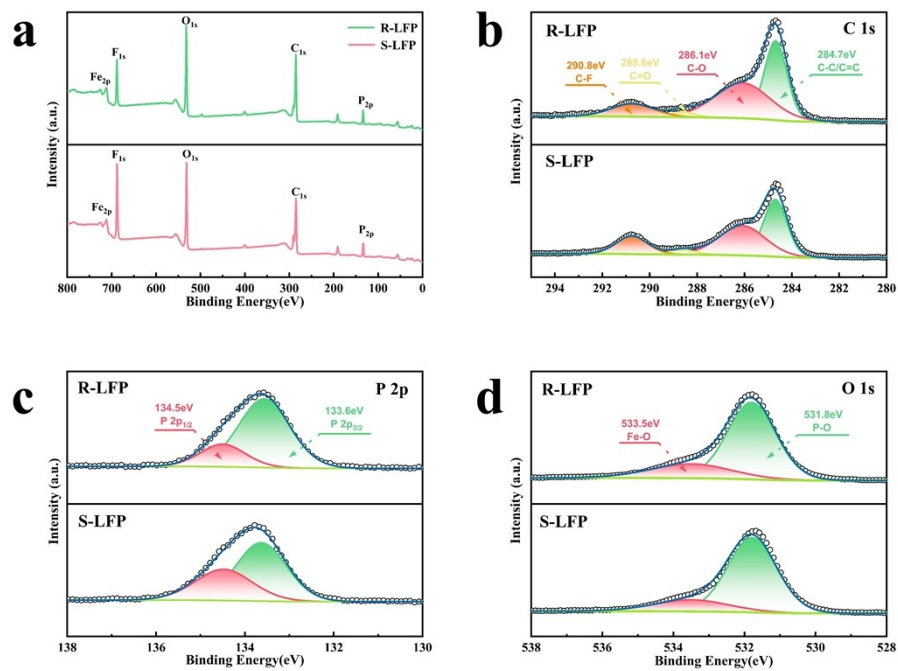

**Figure S 4** XPS spectra of S-LFP and R-LFP(a)XPS survey;(b)C 1s;(c) P 2p;(d) O 1s.



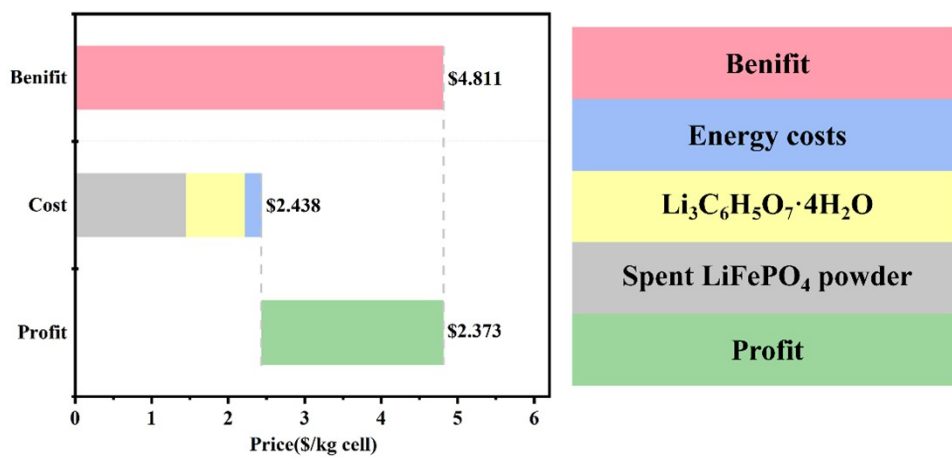

**Figure S 5** Cost and profit per kg of spent LiFePO<sub>4</sub> cells recycled using the proposed process.

**Table S 1** The ICE (Initial Coulombic Efficiency) and the first-cycle charge/discharge specific capacity at 0.1 C rate of S-LFP and regenerated LFP materials at different reaction temperatures.

| Materials                                                      | S-LFP  | 100 °C | 120 °C | 140 °C | 160 °C | 180 °C |
|----------------------------------------------------------------|--------|--------|--------|--------|--------|--------|
| ICE                                                            | 133.1% | 132.6% | 123.1% | 111.6% | 98.7%  | 99.0%  |
| first-cycle charge specific capacity (mAh g <sup>-1</sup> )    | 110.1  | 111.8  | 122.5  | 136.7  | 157.8  | 156.4  |
| first-cycle discharge specific capacity (mAh g <sup>-1</sup> ) | 147.2  | 148.2  | 150.8  | 152.5  | 155.8  | 154.9  |

**Table S 2** The ICE (Initial Coulombic Efficiency) and the first-cycle charge/discharge specific capacity at 0.1 C rate of S-LFP and regenerated LFP materials at different reaction time.

| Materials                                                      | S-LFP  | 1h     | 3h     | 5h     | 7h    | 12h   |
|----------------------------------------------------------------|--------|--------|--------|--------|-------|-------|
| ICE                                                            | 133.1% | 122.7% | 106.1% | 102.7% | 98.8% | 98.7% |
| first-cycle charge specific capacity (mAh g <sup>-1</sup> )    | 110.1  | 123.1  | 145.2  | 151.0  | 157.9 | 157.8 |
| first-cycle discharge specific capacity (mAh g <sup>-1</sup> ) | 147.2  | 151.1  | 154.1  | 155.1  | 156.0 | 155.8 |

**Table S 3** Raman data of samples

| Samples | $I_D$  | $I_G$  | $I_D/I_G$ |
|---------|--------|--------|-----------|
| S-LFP   | 480.18 | 496.00 | 0.9681    |
| R-LFP   | 737.71 | 745.14 | 0.9900    |

**Table S 4** Specific cost of our proposed recycling strategy

| Items                                                                            | Price      | Dosage  | Total | Data Sources |
|----------------------------------------------------------------------------------|------------|---------|-------|--------------|
| Spent LiFePO <sub>4</sub> powder                                                 | \$/kg cell | kg cell | \$    | wechat       |
|                                                                                  | 1.448      | 1       | 1.448 |              |
| Li <sub>3</sub> C <sub>6</sub> H <sub>5</sub> O <sub>7</sub> · 4H <sub>2</sub> O | \$/kg      | kg      | \$    | 1688         |
|                                                                                  | 0.327      | 2.368   | 0.774 |              |
| Energy costs                                                                     | \$/kW h    | kW h    | \$    | fgw          |
|                                                                                  | 0.108      | 2       | 0.216 |              |
| Total                                                                            |            |         | 2.438 |              |

1\$=7.25 ¥ (Update time: 2024/04/29);  
wechat(<https://mp.weixin.qq.com/s/0tvUiemXfEOVIJwdLis-cg>); 1688(<https://www.1688.com/>);  
fgw([https://fgw.hunan.gov.cn/fgw/xxgk\\_70899/zcfg/dfxfg/202401/t20240131\\_32641110.html](https://fgw.hunan.gov.cn/fgw/xxgk_70899/zcfg/dfxfg/202401/t20240131_32641110.html));

**Calculation of benefits and profits:** When recycling of 1kg of spent LiFePO<sub>4</sub> battery, 0.8kg LiFePO<sub>4</sub> can be obtained and 0.8 kg of LiFePO<sub>4</sub> is 4.811\$, the benefits and profits are calculated as follows.

Benefits: 6.014 \$/kg \* 0.8 kg = \$4.811

Profits: \$4.811 - \$2.438 = \$2.373

**Table S 5** The detail data of XPS

| Samples | Elements | Peaks            | Area      | Percentage(%) | R <sup>2</sup> |
|---------|----------|------------------|-----------|---------------|----------------|
| S-LFP   | Fe       | Fe <sup>3+</sup> | 28553.81  | 41.45         | 0.9948         |
|         |          | Fe <sup>2+</sup> | 40338.33  | 58.55         |                |
|         |          | Sat.             | 6920.93   | -             |                |
|         | C        | C-C/C=C          | 54068.61  | 39.45         | 0.9890         |
|         |          | C-O              | 55496.88  | 40.49         |                |
|         |          | C=O              | 4833.82   | 3.53          |                |
|         |          | C-F              | 22662.20  | 16.53         |                |
|         | P        | P <sub>3/2</sub> | 14373.68  | 63.15         | 0.9975         |
|         |          | P <sub>1/2</sub> | 8386.36   | 36.85         |                |
|         | O        | P-O              | 133859.97 | 80.82         | 0.9924         |
| Fe-O    |          | 31767.88         | 19.18     |               |                |
| R-LFP   | Fe       | Fe <sup>2+</sup> | 70293.65  | 100           | 0.9838         |
|         |          | Sat.             | 15370.68  | -             |                |
|         | C        | C-C/C=C          | 59119.34  | 40.86         | 0.9966         |
|         |          | C-O              | 63864.63  | 44.14         |                |
|         |          | C=O              | 3684.83   | 2.55          |                |
|         |          | C-F              | 18013.77  | 12.45         |                |
|         | P        | P <sub>3/2</sub> | 16569.23  | 77.54         | 0.9974         |
|         |          | P <sub>1/2</sub> | 4800.69   | 22.46         |                |
|         | O        | P-O              | 136612.68 | 76.42         | 0.9975         |
|         |          | Fe-O             | 42151.00  | 23.58         |                |

**Table S 6** The detailed components of a spent LFP battery

| Components       | Percentage by weight in % |
|------------------|---------------------------|
| Cathode          | 30.00                     |
| Anode            | 20.00                     |
| Cathode Al foil  | 10.00                     |
| Anode Cu foil    | 11.00                     |
| Separator        | 5.00                      |
| Electrolyte      | 13.00                     |
| Outer shell      | 10.00                     |
| Other components | 1.00                      |

**Table S 7** The comparison of various direct regeneration strategies for spent LFP cathode materials reported in the literature.

| Methods                      | Reagents                                                                                                    | Conditions                                                         | Discharge performance                                                                        | Ref. |
|------------------------------|-------------------------------------------------------------------------------------------------------------|--------------------------------------------------------------------|----------------------------------------------------------------------------------------------|------|
| Solid state sintering        | S-LFP+Li <sub>2</sub> CO <sub>3</sub> +CN<br>Ts+glucose                                                     | heated at 350 °C for 2 h, and then heated at 650 °C for 12 h in Ar | 155.47 mAh g <sup>-1</sup> at 0.05 C, remains stable till 800 cycles at 1 C                  | 3    |
|                              | S-LFP+Li <sub>2</sub> CO <sub>3</sub> +mela<br>mine                                                         | heated at 350 °C for 2 h, and then heated at 650 °C for 12 h in Ar | 135 mA h g <sup>-1</sup> at 2C, 99.03% capacity retention after 200 cycles                   | 4    |
|                              | S-LFP+Li <sub>2</sub> CO <sub>3</sub>                                                                       | heated at 700 °C for 8 h in CO <sub>2</sub>                        | 131.2 mA h g <sup>-1</sup> at 1 C, 88.64% capacity retention after 400 cycles                | 5    |
| Hydrothermal relithiation    | S-LFP+LiOH+H <sub>2</sub> O <sub>2</sub>                                                                    | hydrothermal at 30 °C for 1 h , then annealing at 700 °C for 10 h  | 156.6 mA h g <sup>-1</sup> at 1 C, 84.9% capacity retention after 1000 cycles at 5C          | 6    |
|                              | S-LFP+LiOH+L-ascorbic<br>acid+C <sub>18</sub> H <sub>29</sub> SO <sub>3</sub> Na                            | hydrothermal at 160 °C for 6 h                                     | 150.4 mA h g <sup>-1</sup> at 0.5 C, remains stable till 300 cycles                          | 7    |
|                              | S-LFP+Li <sub>2</sub> SO <sub>4</sub> +Na <sub>2</sub> S<br>O <sub>3</sub>                                  | hydrothermal at 200 °C for 6 h                                     | 145.1 mA h g <sup>-1</sup> at 0.1 C, 99% capacity retention after 100 cycles at 1 C          | 8    |
| Electrochemical relithiation | Li <sub>2</sub> SO <sub>4</sub> as the electrolyte                                                          | Three-electrode system                                             | 136.5 mAh g <sup>-1</sup> at 1 C, 95.32 % capacity retention after 300 cycles at 5 C         | 9    |
|                              | Li <sub>2</sub> SO <sub>4</sub> as the electrolyte                                                          | Three-electrode system                                             | 135.2 mA h g <sup>-1</sup> at 1 C, 95.30% capacity retention rate after 500 cycles.          | 10   |
|                              | Li <sub>2</sub> C <sub>2</sub> O <sub>4</sub> as lithium source                                             | Functionalized prelithiation separator                             | 146.7 mAh g <sup>-1</sup> at 1C in the full cell, 90.7 % capacity retention after 292 cycles | 11   |
| Our work                     | S-LFP+Li <sub>3</sub> C <sub>6</sub> H <sub>5</sub> O <sub>7</sub> ·4<br>H <sub>2</sub> O + ethylene glycol | hydrothermal at 160 °C for 7 h                                     | 142.7 mAh g <sup>-1</sup> at 1 C, remains stable till 200 cycles                             |      |



## Reference

1. A. Van Hoonacker and P. Englebienne, *Current Nanoscience*, 2006, **2**, 359-371.
2. P. Xu, Q. Dai, H. Gao, H. Liu, M. Zhang, M. Li, Y. Chen, K. An, Y. S. Meng, P. Liu, Y. Li, J. S. Spangenberg, L. Gaines, J. Lu and Z. Chen, *Joule*, 2020, **4**, 2609-2626.
3. L. Song, C. Qi, S. Wang, X. Zhu, T. Zhang, Y. Jin and M. Zhang, *Waste Management*, 2023, **157**, 141-148.
4. Y. Gou, C. Qi, R. Li, X. Liu, Z. Zhou, M. Zhang, Q. Sun, L. Song and Y. Jin, *Electrochimica Acta*, 2024, **488**, 144180.
5. H. Sun, X. Li, B. Wu, K. Zhu, Y. Gao, T. Bao, H. Wu and D. Cao, *Chinese Chemical Letters*, 2024, DOI: <https://doi.org/10.1016/j.cclet.2024.110041>, 110041.
6. Y. Xu, B. Zhang, Z. Ge, H. Wang, N. Hong, X. Xiao, B. Song, Y. Zhang, Y. Tian, W. Deng, G. Zou, H. Hou and X. Ji, *Chemical Engineering Journal*, 2023, **477**, 147201.
7. W. Song, J. Liu, L. You, S. Wang, Q. Zhou, Y. Gao, R. Yin, W. Xu and Z. Guo, *Journal of Power Sources*, 2019, **419**, 192-202.
8. Y. Yang, Z. Liu, J. Zhang, Y. Chen and C. Wang, *Journal of Alloys and Compounds*, 2023, **947**, 169660.
9. Y. Yang, J. Zhang, H. Zhang, Y. Wang, Y. Chen and C. Wang, *Energy Storage Materials*, 2024, **65**, 103081.
10. D. Peng, X. Wang, S. Wang, B. Zhang, X. Lu, W. Hu, J. Zou, P. Li, Y. Wen and J. Zhang, *Green Chemistry*, 2022, **24**, 4544-4556.
11. M. Fan, Q. Meng, X. Chang, C. F. Gu, X. H. Meng, Y. X. Yin, H. Li, L. J. Wan and Y. G. Guo, *Advanced Energy Materials*, 2022, **12**, 2103630.
